# Supplementary material for: Physical and Anthropometric Characteristics Do Not Differ According to Birth Year Quartile in High-Level Junior Australian Football Players
Source: MDPI journal article supplement (doi:10.3390/sports9080111), 2021-08-12
Supplement: s1 [file s1]

Supplementary Materials

# Physical and Anthropometric Characteristics Do not Differ According to Birth Year Quartile in High-Level Junior Australian Football Players

Paul Larkin <sup>1,2,\*</sup>, Carl T. Woods <sup>1</sup>, Jade Haycraft <sup>1</sup> and David B. Pyne <sup>3</sup>

<sup>1</sup> Institute for Health and Sport, Victoria University, Melbourne VIC 8001, Australia; carl.woods@vu.edu.au (C.T.W.); jade.haycraft@vu.edu.au (J.H.)

<sup>2</sup> Maribrynong Sports Academy, Melbourne VIC 3032, Australia

<sup>3</sup> Research Institute for Sport and Exercise, University of Canberra, Canberra ACT 2617, Australia; David.Pyne@canberra.edu.au

\* Correspondence: paul.larkin@vu.edu.au

**Citation:** Larkin, P.; Woods, C.T.; Haycraft, J.; Pyne, D.B. Physical and Anthropometric Characteristics Do not Differ According to Birth Year Quartile in High-Level Junior Australian Football Players. *Sports* **2021**, *9*, 111.

<https://doi.org/10.3390/sports9080111>

**Publisher's Note:** MDPI stays neutral with regard to jurisdictional claims in published maps and institutional affiliations.

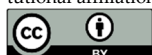

**Copyright:** © 2021 by the authors. Licensee MDPI, Basel, Switzerland. This article is an open access article distributed under the terms and conditions of the Creative Commons Attribution (CC BY) license (<http://creativecommons.org/licenses/by/4.0/>).

**Table S1.** Physical and anthropometric characteristics of players relative to birth quartile.

| Birth Quartile (Sample Size) | Standing Height (cm) | Body Mass (kg) | Vertical Jump (cm) | Dynamic VJR (cm) | Dynamic VJL (cm) | 20 m Sprint (s) | AFL Agility (s) | 20 m MSFT (m) |
|------------------------------|----------------------|----------------|--------------------|------------------|------------------|-----------------|-----------------|---------------|
| Q1 (1396)                    | 185.6 ± 6.9          | 79.1 ± 7.8     | 60.3 ± 6.9         | 70.8 ± 8.6       | 72.8 ± 8.5       | 3.08 ± 0.10     | 8.60 ± 0.30     | 2463 ± 407    |
| Q2 (1068)                    | 185.8 ± 7.3          | 79.4 ± 8.3     | 60.6 ± 6.6         | 70.7 ± 8.5       | 73.1 ± 8.7       | 3.07 ± 0.10     | 8.60 ± 0.32     | 2439 ± 380    |
| Q3 (913)                     | 185.7 ± 7.2          | 79.1 ± 8.5     | 60.6 ± 6.7         | 70.9 ± 8.3       | 72.9 ± 8.7       | 3.08 ± 0.10     | 8.57 ± 0.31     | 2456 ± 381    |
| Q4 (694)                     | 186.2 ± 7.5          | 79.5 ± 8.4     | 61.0 ± 6.7         | 71.1 ± 8.6       | 73.7 ± 8.7       | 3.07 ± 0.10     | 8.58 ± 0.31     | 2465 ± 460    |

Note: VJR denotes vertical jump right leg take-off; VJL denotes vertical jump left leg take-off; AFL denotes the Australian Football League; MSFT denotes the Multi-Stage Fitness Test.
